# Supplementary material
Source: PubMed Central journal article supplement (PMC8324669)

<sup>1</sup>Programa de Pós-Graduação em Biociência Animal, Departamento de Morfologia e Fisiologia Animal, Universidade Federal Rural de Pernambuco, Recife, PE, Brazil.

<sup>2</sup>Departamento de Micologia Prof. Chaves Batista, Universidade Federal de Pernambuco, Recife, PE, Brazil.

<sup>3</sup>Departamento de Estatística e Matemática Aplicada, Universidade Federal do Ceará, Fortaleza, CE, Brazil.

<sup>4</sup>Sierra Nevada Research Institute, University of California, Merced, USA.

<sup>5</sup>Setor de Micologia, Departamento de Biociências e Tecnologia, Instituto de Patologia Tropical e Saúde Pública (IPTSP), Universidade Federal de Goiás (UFG), Goiânia, GO, Brazil.

<sup>6</sup>Laboratório de Microbiologia, Tecnologia Enzimática e Bioprodutos, Universidade Federal do Agreste de Pernambuco (UFAPE), Garanhuns, PE, Brazil.

**Correspondence:** Jadson D.P. Bezerra (jadsondpb@gmail.com; jadsonbezerra@ufg.br) and Keila A. Moreira (moreirakeila@hotmail.com; keila.moreira@ufape.edu.br)

Online Resource Fig. 1

Maximum likelihood (ML) phylogenetic tree based on ITS rDNA sequences of endophytic fungi (bold and blue) isolated from leaves of *Mandevilla catimbauensis* growing in a Brazilian tropical dry forest (Caatinga). *Earliella scabrosa* URM 7788 (Basidiomycota) was used as outgroup. Bootstrap support values above 70% are shown near nodes.

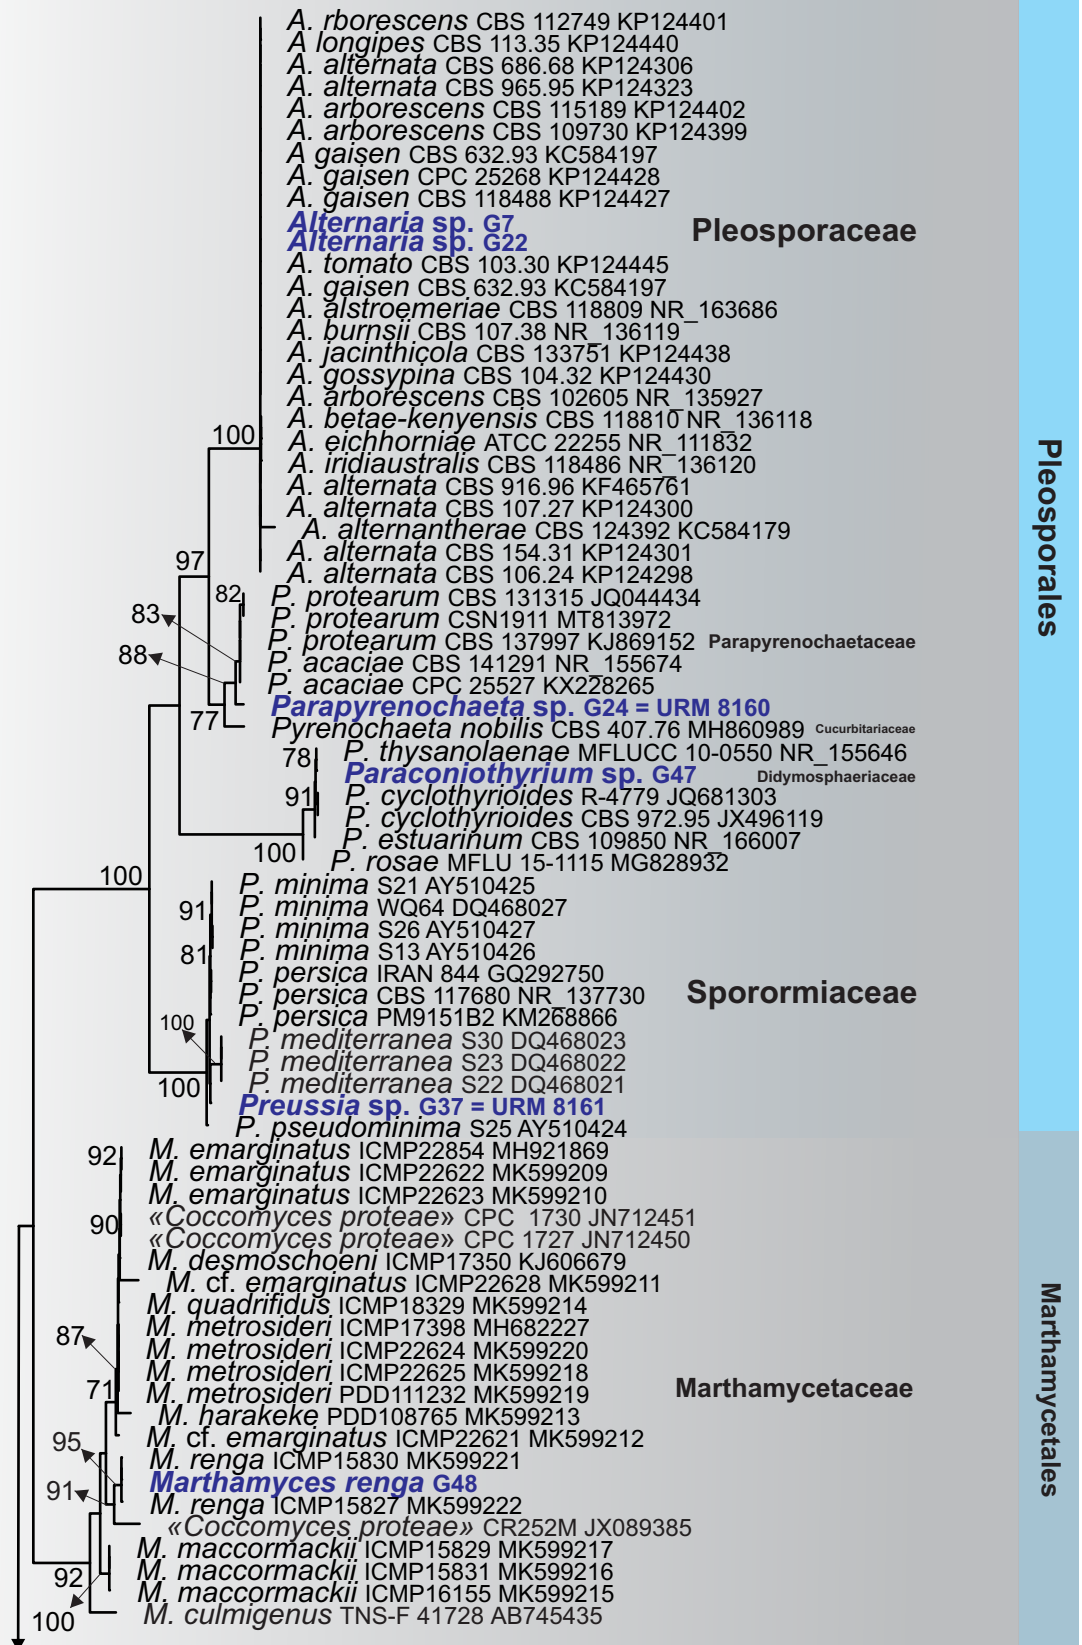

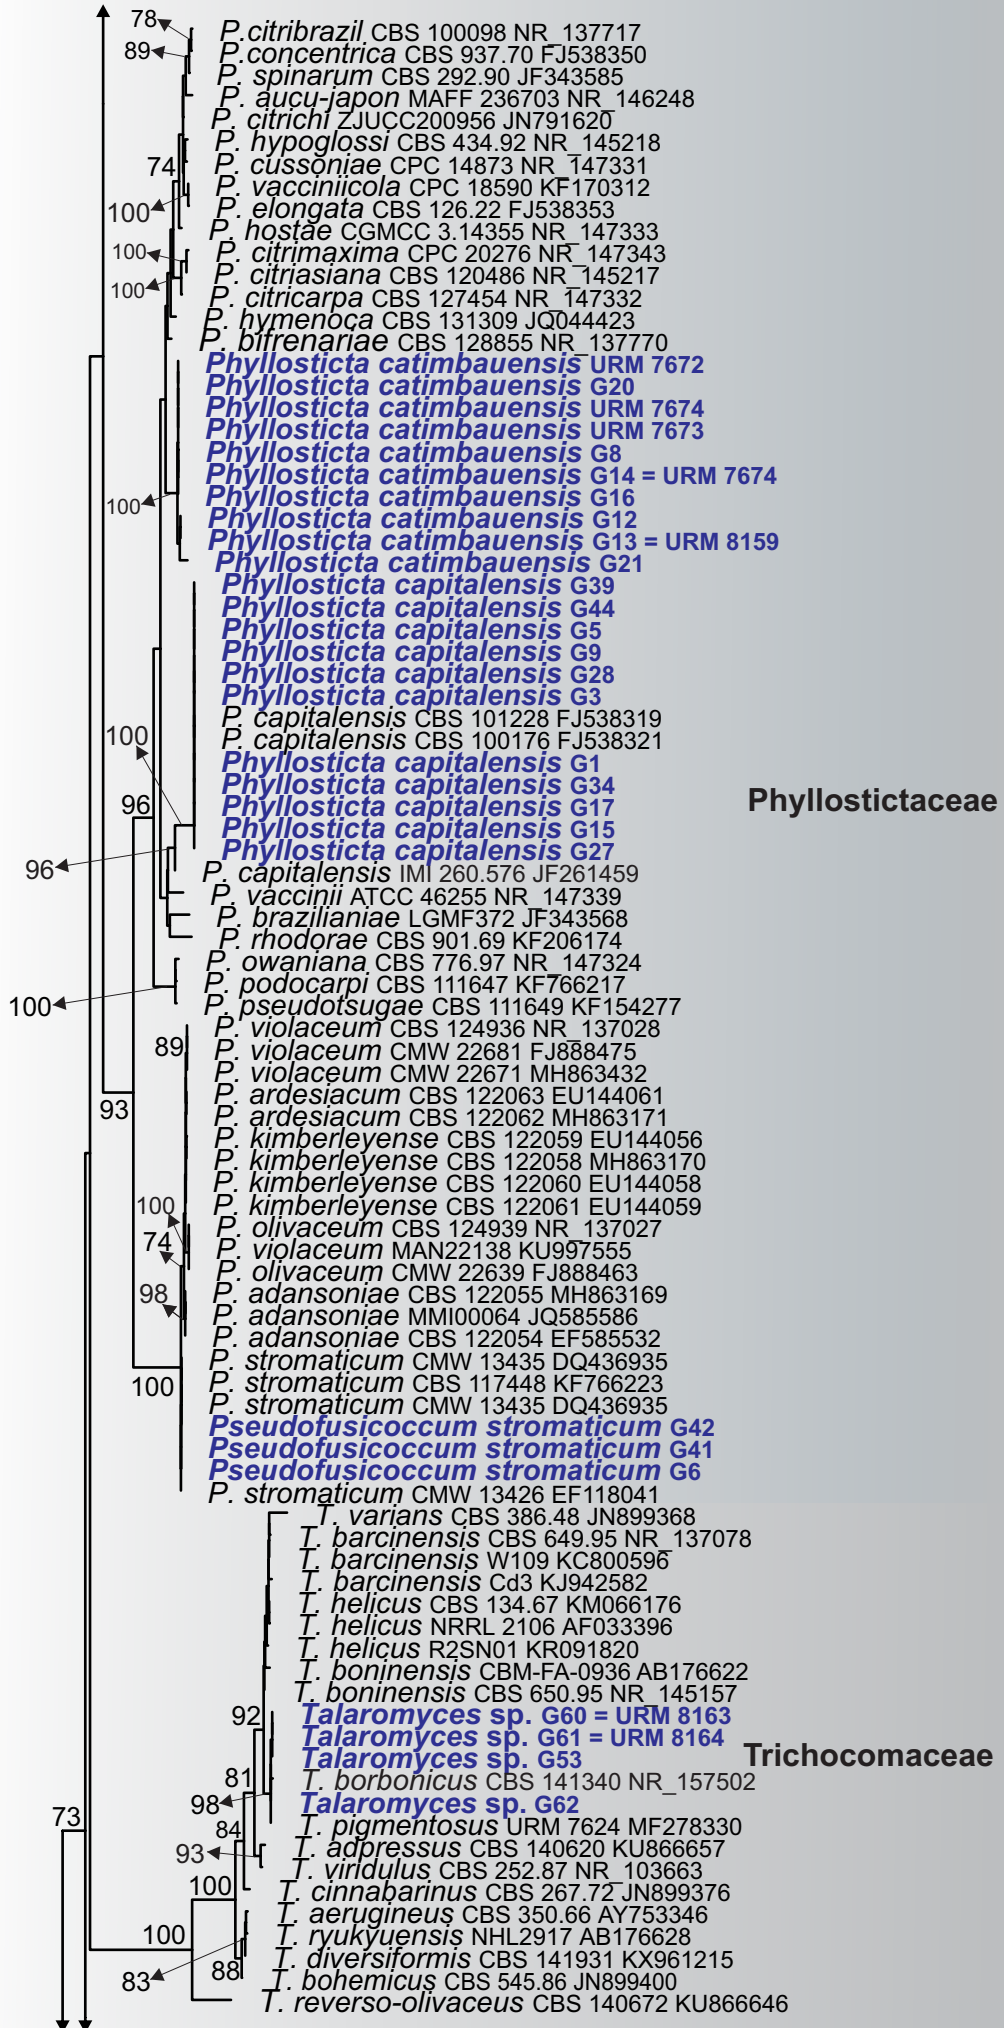

Botryosphaerales

Eurotiales

<sup>1</sup>Programa de Pós-Graduação em Biociência Animal, Departamento de Morfologia e Fisiologia Animal, Universidade Federal Rural de Pernambuco, Recife, PE, Brazil.

<sup>2</sup>Departamento de Micologia Prof. Chaves Batista, Universidade Federal de Pernambuco, Recife, PE, Brazil.

<sup>3</sup>Departamento de Estatística e Matemática Aplicada, Universidade Federal do Ceará, Fortaleza, CE, Brazil.

<sup>4</sup>Sierra Nevada Research Institute, University of California, Merced, USA.

<sup>5</sup>Sector de Micologia, Departamento de Biociências e Tecnologia, Instituto de Patologia Tropical e Saúde Pública (IPTSP), Universidade Federal de Goiás (UFG), Goiânia, GO, Brazil.

<sup>6</sup>Laboratório de Microbiologia, Tecnologia Enzimática e Bioprodutos, Universidade Federal do Agreste de Pernambuco (UFAPE), Garanhuns, PE, Brazil.

**Correspondence:** Jadson D.P. Bezerra (jadsondpb@gmail.com; jadsonbezerra@ufg.br) and Keila A. Moreira (moreirakeila@hotmail.com; keila.moreira@ufape.edu.br)

Online Resource Fig. 1 (cont.)

Maximum likelihood (ML) phylogenetic tree based on ITS rDNA sequences of endophytic fungi (bold and blue) isolated from leaves of *Mandevilla catimbauensis* growing in a Brazilian tropical dry forest (Caatinga). *Earliella scabrosa* URM 7788 (Basidiomycota) was used as outgroup. Bootstrap support values above 70% are shown near nodes.

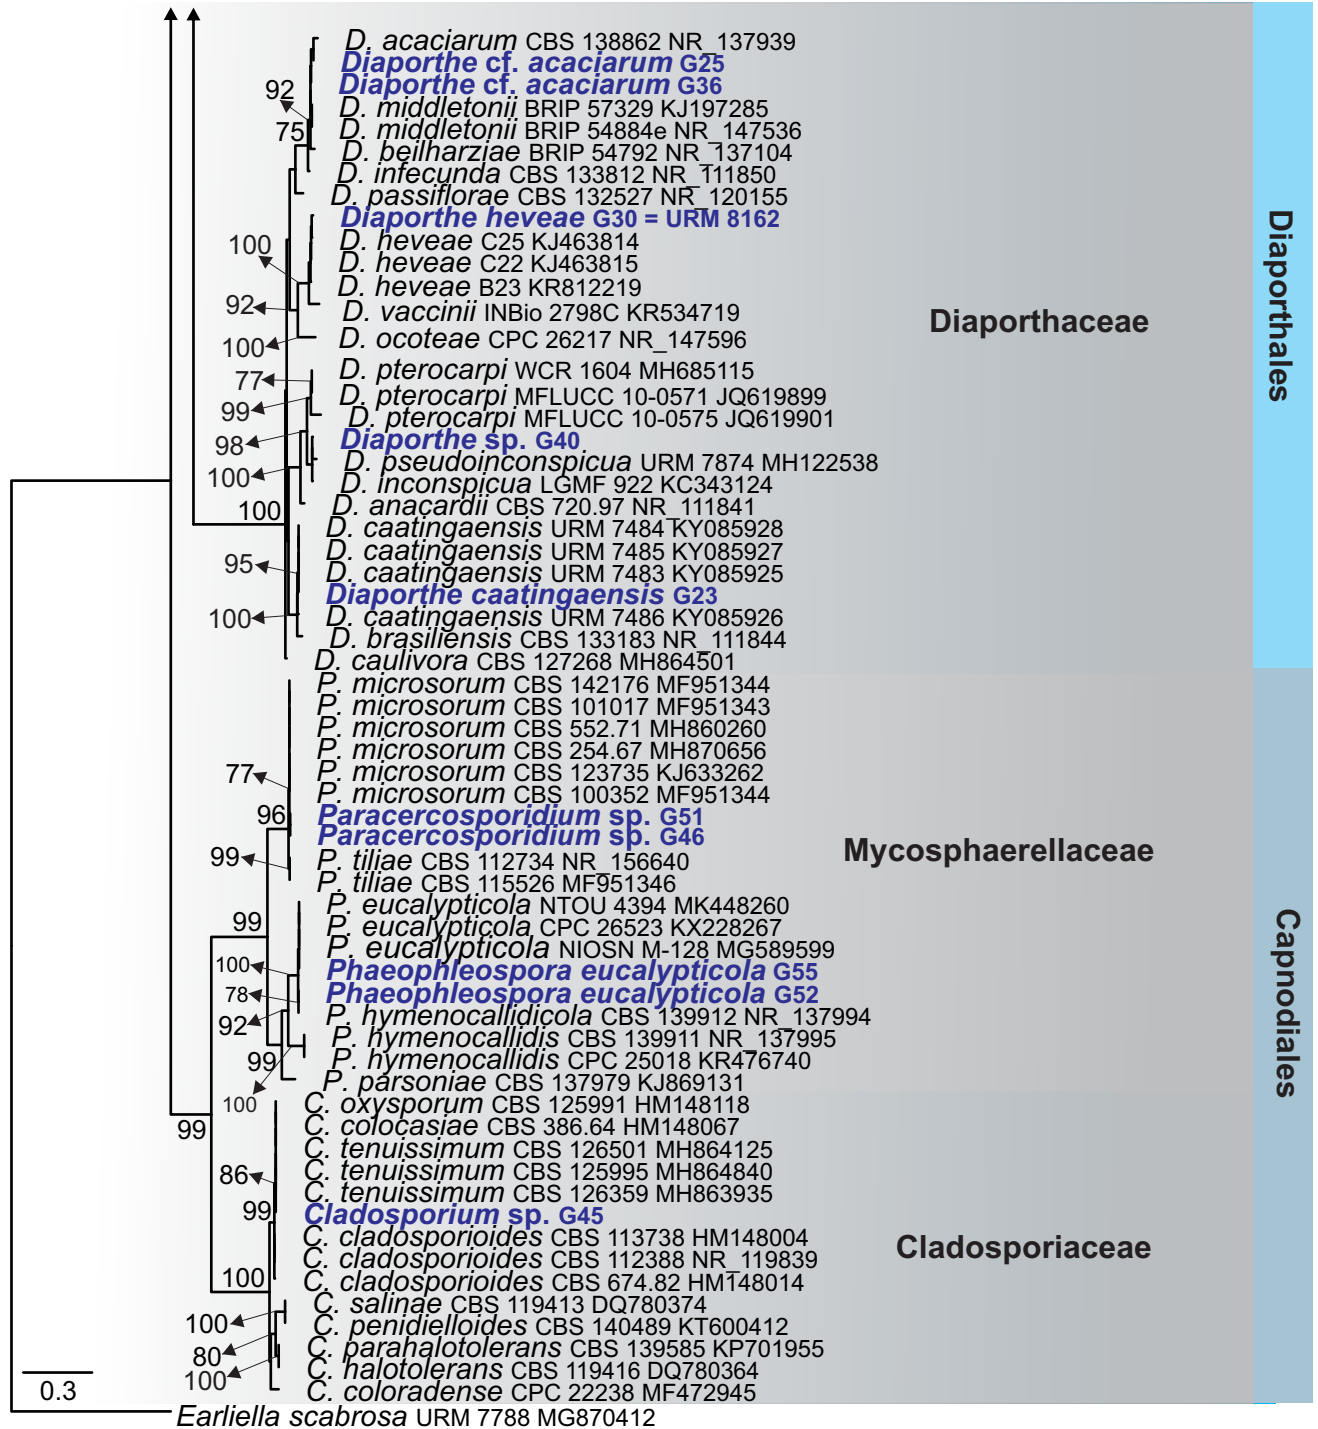

Supplement: 42770_2021_505_MOESM3_ESM.pdf [file 42770_2021_505_MOESM3_ESM.pdf]
