# Supplementary material
Source: PubMed Central journal article supplement (PMC8324669)

A

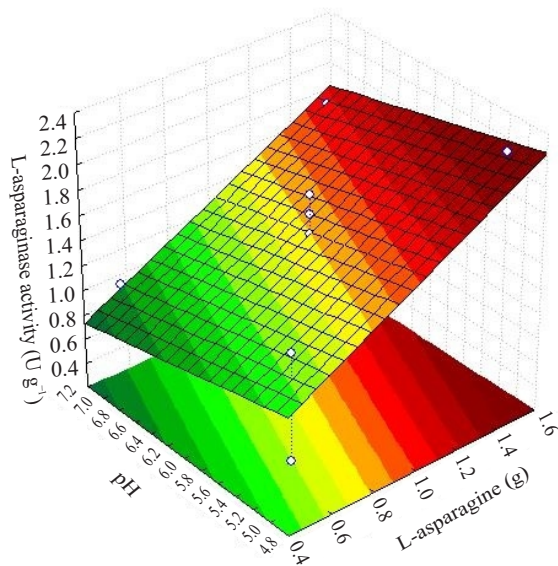

B

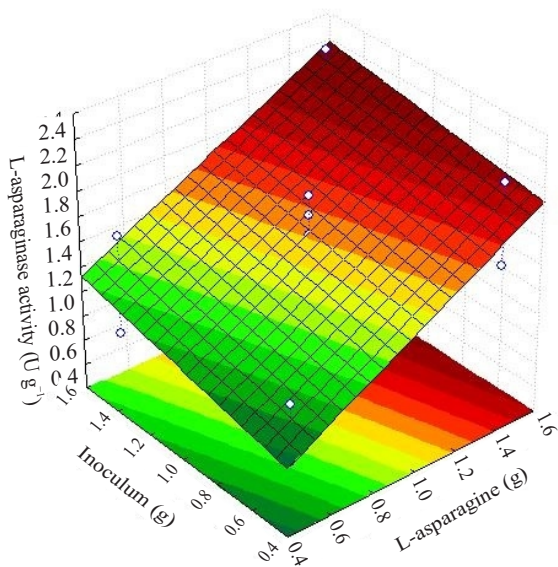

C

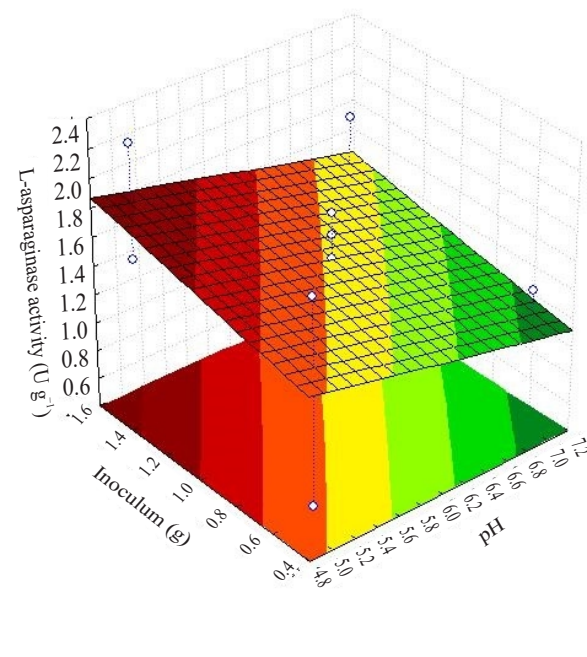

Fungal endophytes from leaves of *Mandevilla catimbauensis* (Apocynaceae): Diversity and potential for L-asparaginase production

Brazilian Journal of Microbiology

Gianne R. Araújo-Magalhães<sup>1</sup>, Marília H.C. Maciel<sup>2</sup>, Leticia F. da Silva<sup>2</sup>, Gualberto S. Agamez-Montalvo<sup>3</sup>, Iolanda R. da Silva<sup>4</sup>, Jadson D.P. Bezerra<sup>5</sup>, Cristina M. Souza-Motta<sup>2</sup>, Keila A. Moreira<sup>6</sup>

<sup>1</sup> Programa de Pós-Graduação em Biociência Animal, Departamento de Morfologia e Fisiologia Animal, Universidade Federal Rural de Pernambuco, Recife, PE, Brazil.

<sup>2</sup> Departamento de Micologia Prof. Chaves Batista, Universidade Federal de Pernambuco, Recife, PE, Brazil.

<sup>3</sup> Departamento de Estatística e Matemática Aplicada, Universidade Federal do Ceará, Fortaleza, CE, Brazil.

<sup>4</sup> Sierra Nevada Research Institute, University of California, Merced, USA.

<sup>5</sup> Setor de Micologia, Departamento de Biociências e Tecnologia, Instituto de Patologia Tropical e Saúde Pública (IPTSP), Universidade Federal de Goiás (UFG), Goiânia, GO, Brazil.

<sup>6</sup> Laboratório de Microbiologia, Tecnologia Enzimática e Bioprodutos, Universidade Federal do Agreste de Pernambuco (UFAPE), Garanhuns, PE, Brazil.

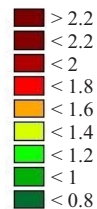

**Correspondence:** Jadson D.P. Bezerra (jadsondpb@gmail.com; jadsonbezerra@ufg.br) and Keila A. Moreira (moreirakeila@hotmail.com; keila.moreira@ufape.edu.br)

Online Resource Fig. 2

Response surface and contour curve for L-asparaginase activity ( $\text{U g}^{-1}$ ) production by *Phyllosticta catimbauensis* URM 7672 in function of pH and L-asparagine (A), inoculum and L-asparagine (B), and pH and inoculum (C).

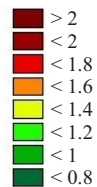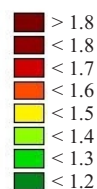

Supplement: 42770_2021_505_MOESM4_ESM.pdf [file 42770_2021_505_MOESM4_ESM.pdf]
